# Supplementary material for: Evaluation of plant-derived semi-synthetic molecules against BRD3-BD2 protein: a computational strategy to combat breast cancer
Source: Royal Society of Chemistry journal article supplement (doi:10.1039/d1me00183c), 2022-01-01
Supplement: d1me00183c1.pdf [file d1me00183c1.pdf]

## Supplementary materials

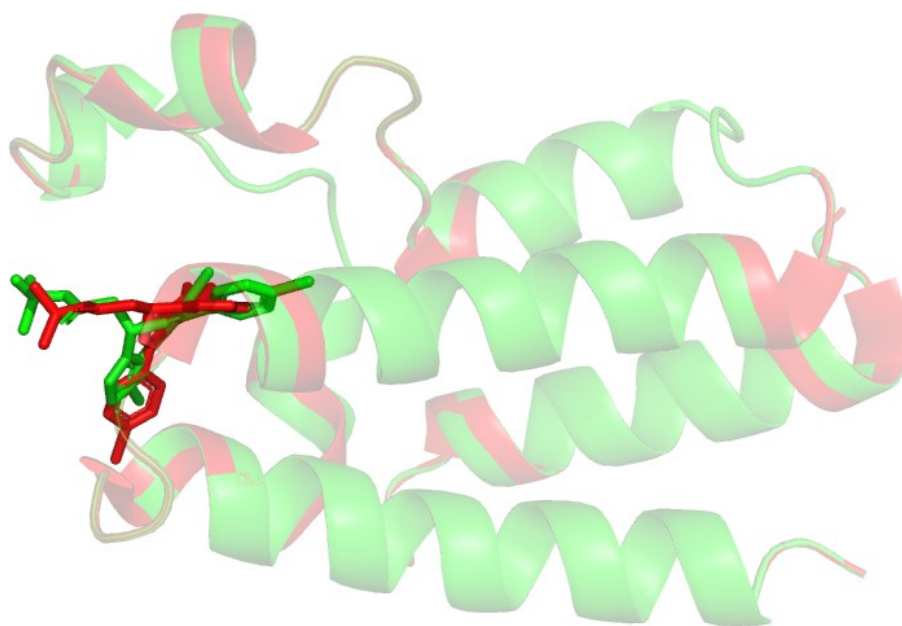

**Fig. S1.** Conformations of experimental complex (JQ-1 in green) and re-docked complex (JQ-1 in red).

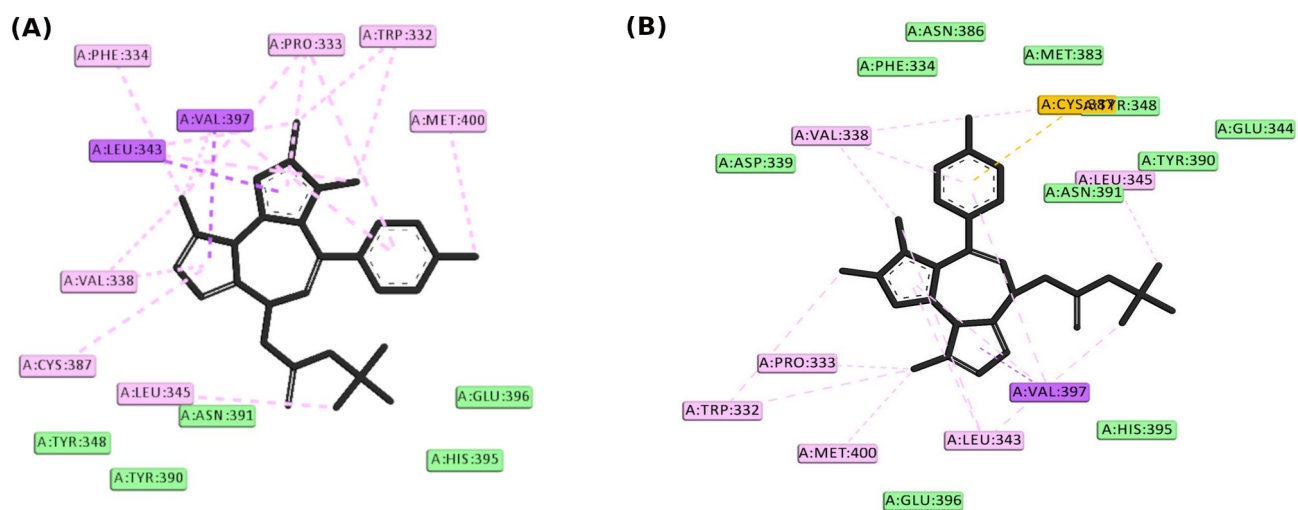

**Fig. S2.** 2D interaction of experimentally co-crystallized molecule (JQ-1) **(A)** and re-docked JQ-1 **(B)**.

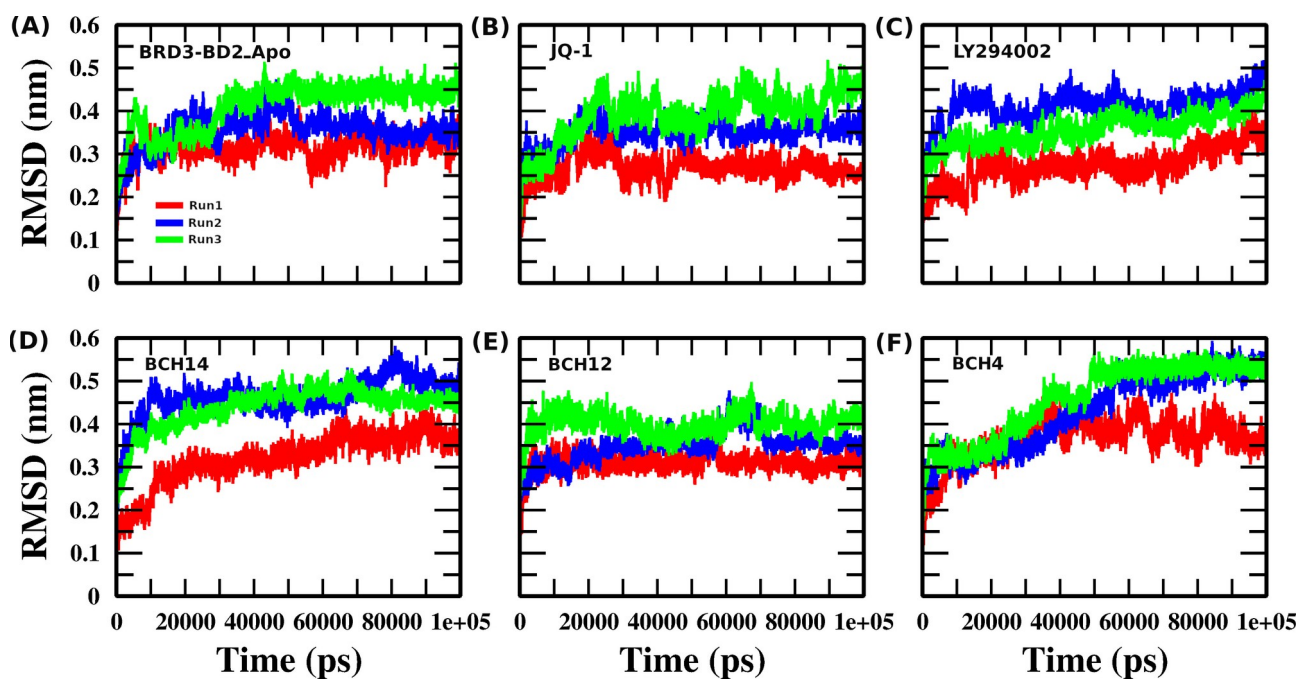

**Fig. S3.** RMSD trajectories of BRD3-BD2\_Apo and selected complexes in triplicates; run1 (red), run2 (blue) and run3 (green) **(A)** BRD3-BD2-Apo, **(B)** JQ-1, **(C)** LY294002, **(D)** BCH14, **(E)** BCH12, and **(F)** BCH4.

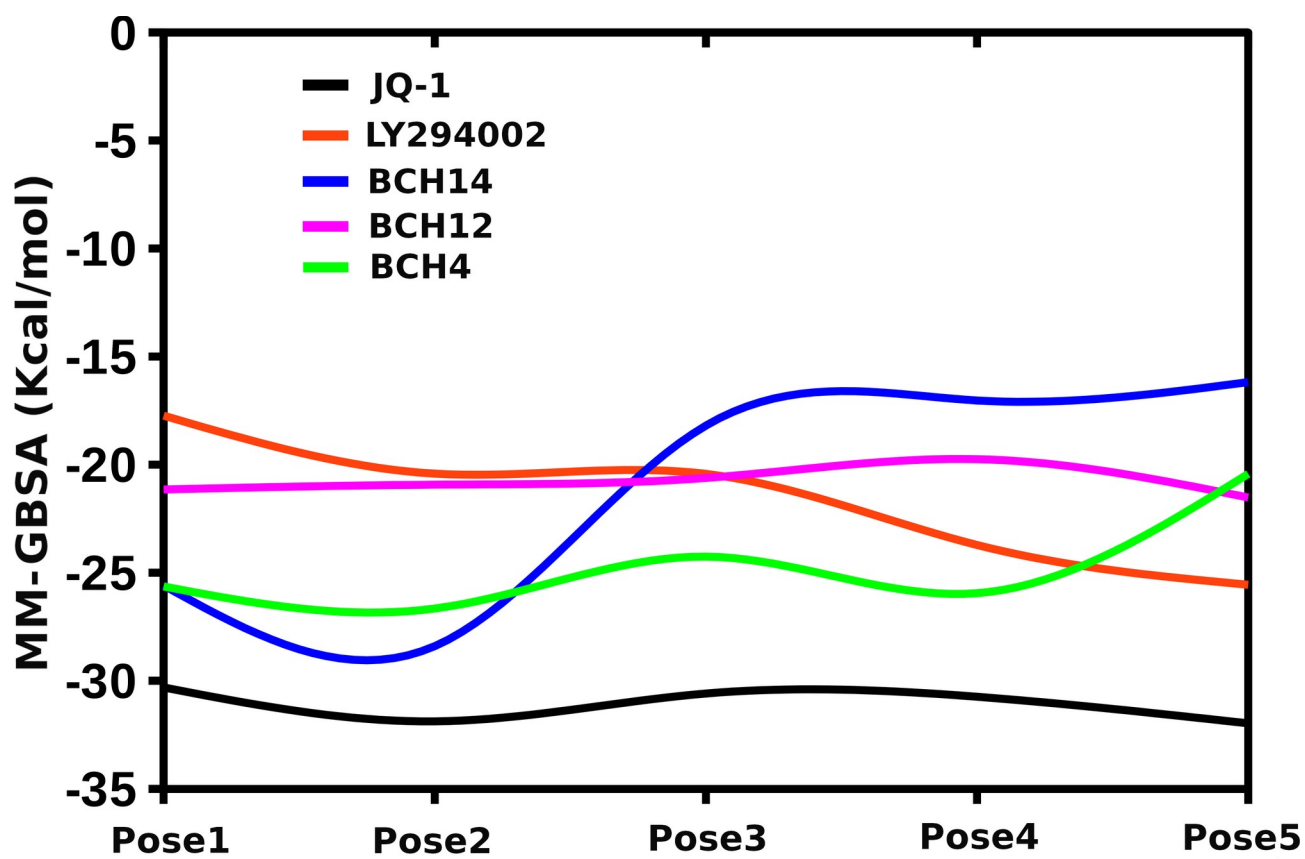

Fig. S4. Radius of gyration analysis; JQ-1 (black), LY294002 (red), BCH14 (blue), BCH12 (magenta) and BCH4 (green).

**Table S1.** CDOCKER interaction energy of selected seventeen BCH molecules and two reference inhibitors (JQ-1 and LY294002).

| <b>S. No.</b> | <b>Molecules</b> | <b>CDOCKER interaction energy</b> |
|---------------|------------------|-----------------------------------|
| 1.            | BCH1             | -33.32                            |
| 2.            | BCH2             | -31.61                            |
| 3.            | BCH3             | -31.98                            |
| 4.            | <b>BCH4</b>      | <b>-48.72</b>                     |
| 5.            | BCH5             | -40.62                            |
| 6.            | BCH6             | -37.55                            |
| 7.            | BCH7             | -34.39                            |
| 8.            | BCH8             | -40.60                            |
| 9.            | BCH9             | -37.34                            |
| 10.           | BCH10            | -36.96                            |
| 11.           | BCH11            | -35.89                            |
| 12.           | <b>BCH12</b>     | <b>-48.78</b>                     |
| 13.           | BCH13            | -31.30                            |
| 14.           | <b>BCH14</b>     | <b>-48.14</b>                     |
| 15.           | BCH15            | -40.04                            |
| 16.           | BCH16            | -37.03                            |
| 17.           | BCH17            | -32.00                            |
| 18.           | <b>JQ-1</b>      | <b>-41.27</b>                     |
| 19.           | <b>LY294002</b>  | <b>-32.27</b>                     |

**Table S2.** Interaction analysis of JQ-1, LY294002, BCH4, BCH12 and BCH14 complexes.

| <b>Complexes</b> | <b>Hydrogen bond</b> | <b><math>\pi</math>-sigma interaction</b> | <b><math>\pi</math>-anion interaction</b> | <b><math>\pi</math>-<math>\pi</math> T-shaped interaction</b> | <b><math>\pi</math>-alkyl interaction</b>                      | <b>Hydrophobic interactions</b>                                                         |
|------------------|----------------------|-------------------------------------------|-------------------------------------------|---------------------------------------------------------------|----------------------------------------------------------------|-----------------------------------------------------------------------------------------|
| <b>JQ-1</b>      | -                    | Val397                                    | Cys387                                    | -                                                             | Trp332, Pro333, Val338, Leu343, Leu345, Met400                 | Phe334, Asp339, Glu344, Tyr348, Met383, Asn386, Tyr390, Asn391, His395, Glu396          |
| <b>LY294002</b>  | -                    | -                                         | -                                         | -                                                             | Pro333, Val338, Leu343, Cys387, Val397                         | Trp332, Phe334, Leu345, Tyr348, Tyr390, Asn391, His395, Glu396                          |
| <b>BCH4</b>      | Pro333, Lys336       | -                                         | Cys387                                    | Trp332                                                        | Phe334, Val338, Leu343, His395, Val397, Met400                 | Tyr335, Pro337, Leu345, Tyr348, Met383, Asn386, Tyr390, Asn391, Glu396                  |
| <b>BCH12</b>     | Leu343, Cys387       | -                                         | -                                         | Trp332                                                        | Phe333, Lys336, Val338, Leu345, Tyr348, Tyr390, His395, Val397 | Phe334, Tyr335, Pro337, Asp339, Asn386, Asn391, Leu396                                  |
| <b>BCH14</b>     | -                    | -                                         | Cys387                                    | Trp332                                                        | Pro333, Val338, Leu343, His395, Val397, Met400                 | Phe334, Tyr335, Lys336, Pro337, Leu345, Tyr348, Met383, Asn386, Tyr390, Asn391, Glu396, |

**Table. S3.** Average RMSD values of BRD3-BD2\_Apo, JQ-1, LY294002, BCH4, BCH12 and BCH14 systems.

| <b>Complexes</b>    | <b>Average RMSD (nm)</b> |
|---------------------|--------------------------|
| <b>BRD3-BD2_Apo</b> | 0.315 nm                 |
| <b>JQ-1</b>         | 0.278 nm                 |
| <b>LY294002</b>     | 0.274 nm                 |
| <b>BCH4</b>         | 0.319 nm                 |
| <b>BCH12</b>        | 0.299 nm                 |
| <b>BCH14</b>        | 0.364 nm                 |

**Table S4.** Highest RMSF peak value of ZA-loop,  $\alpha$ A and  $\alpha$ B regions.

| <b>Complexes</b>    | <b>Highest RMSF peak value of ZA-loop region (336-352 residue)</b> | <b>Highest RMSF peak value of <math>\alpha</math>A, and <math>\alpha</math>B regions (363-367, and 372-380 residue)</b> |
|---------------------|--------------------------------------------------------------------|-------------------------------------------------------------------------------------------------------------------------|
| <b>BRD3-BD2_Apo</b> | 0.36 nm                                                            | 0.40 nm                                                                                                                 |
| <b>JQ-1</b>         | 0.58 nm                                                            | 0.45 nm                                                                                                                 |
| <b>LY294002</b>     | 0.41 nm                                                            | 0.42 nm                                                                                                                 |
| <b>BCH4</b>         | 0.41 nm                                                            | 0.45 nm                                                                                                                 |
| <b>BCH12</b>        | 0.40 nm                                                            | 0.28 nm                                                                                                                 |
| <b>BCH14</b>        | 0.41 nm                                                            | 0.45 nm                                                                                                                 |



**Table. S5.** Cluster RMSD of backbone C $\alpha$  atoms of selected systems.

| <b>Complexes</b>    | <b>Average RMSD (nm)</b> | <b>clusters</b> |
|---------------------|--------------------------|-----------------|
| <b>BRD3-BD2_Apo</b> | 0.200419                 | 51              |
| <b>JQ-1</b>         | 0.185601                 | 51              |
| <b>LY294002</b>     | 0.198332                 | 51              |
| <b>BCH4</b>         | 0.19081                  | 51              |
| <b>BCH12</b>        | 0.175217                 | 48              |
| <b>BCH14</b>        | 0.203788                 | 51              |
